# Supplementary material
Source: Springer Nature journal article supplement (https://www.springermedizin.de/resource/supplementary/13054_2011_9801_MOESM1_ESM.pdf/9706986)
Supplement: MOESM1 [file 9706986]

Absolute percent difference  
between treatments (95% CI)

Moderate to severe illness

APACHE II  $\geq 15$

Severe sepsis with  $\geq 1$  organ dysfunction

Respiratory dysfunction

Renal dysfunction

Hepatic dysfunction

Cardiovascular dysfunction

Severe sepsis with multiple organ dysfunction

Treatment in ICU

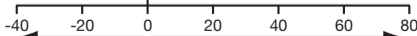

Fluconazole better  
Anidulafungin better
